# Supplementary material for: Correlation of neuter status and expression of heritable disorders
Source: Canine Genet Epidemiol. 2017 May 26;4:6. doi: 10.1186/s40575-017-0044-6 (PMC5445488; doi:10.1186/s40575-017-0044-6)
Supplement: Supplementary file 1 — Number of cases and controls for each condition by breed used in the study. (XLSX 48 kb) [file 40575_2017_44_MOESM1_ESM.xlsx]

## Sheet: Breed Case Totals
			CONGENITAL1										OCULAR				ORTHOPEDIC										CANCERS										OTHER
			ASTEN	ASTEN	MVD	MVD	PDA	PDA	PSS	PSS	VSD	VSD	CAT	CAT	LLUX	LLUX	ELDYS	ELDYS	HPDYS	HPDYS	IVDD	IVDD	PLUX	PLUX	RACL	RACL	HMSC	HMSC	CUSH	CUSH	LYMPH	LYMPH	MAST	MAST	OSC	OSC	DCM	DCM	GDV	GDV	EPI	EPI	VEH	VEH
Breed	Breed Code	Total	Case	Control	Case	Control	Case	Control	Case	Control	Case	Control	Case	Control	Case	Control	Case	Control	Case	Control	Case	Control	Case	Control	Case	Control	Case	Control	Case	Control	Case	Control	Case	Control	Case	Control	Case	Control	Case	Control	Case	Control	Case	Control
AUSTRALIAN CATTLE DOG	ACD*	889	2	887	0	889	2	887	2	887	0	889	4	840	8	881	14	875	6	883	34	855	6	883	12	877	6	883	18	871	17	872	12	877	1	888	0	889	0	889	7	882	52	837
AMERICAN ESKIMO DOG	AE*	247	1	246	0	247	1	246	2	245	1	246	2	231	1	246	1	246	1	246	17	230	9	238	0	247	0	247	13	234	5	242	3	244	1	246	0	247	0	247	4	242	8	239
AMERICAN FOXHOUND	AF*	19	1	18	0	19	0	19	1	18	1	18	0	18	0	19	0	19	0	19	0	19	0	19	0	19	0	19	0	19	1	18	0	19	0	19	1	18	0	19	0	19	1	18
AFFENPINSCHER	AFP	9	0	9	0	9	0	9	0	9	0	9	0	9	0	9	0	9	0	9	2	7	1	8	0	9	0	9	1	8	0	9	0	9	0	9	0	9	0	9	0	9	0	9
AFGHAN HOUND	AH*	75	1	74	0	75	0	75	1	74	0	75	0	74	1	74	0	75	1	74	1	74	1	74	0	75	3	72	1	74	1	74	0	75	1	74	1	74	0	75	0	75	0	75
AKITA	AK*	422	0	422	1	421	0	422	1	421	2	420	4	404	1	421	6	416	20	402	19	403	24	398	17	405	1	421	5	417	5	417	1	421	3	419	2	420	8	414	4	416	6	416
ALASKAN MALAMUTE	AM*	334	3	331	0	334	0	334	1	333	3	331	5	318	0	334	7	327	17	317	13	321	2	332	7	327	2	332	3	331	5	329	3	331	11	323	1	333	1	333	2	332	5	329
ANATOLIAN SHEPHERD DOG	ANS	37	0	37	0	37	0	37	0	37	0	37	0	37	0	37	2	35	2	35	2	35	1	36	0	37	0	37	0	37	0	37	0	37	0	37	1	36	0	37	1	36	0	37
AUSTRALIAN SHEPHERD	AS*	1421	4	1417	3	1418	11	1410	7	1414	2	1419	32	1327	2	1419	6	1415	19	1402	55	1366	11	1410	15	1406	18	1403	12	1409	37	1384	17	1404	10	1411	0	1421	0	1421	29	1385	44	1377
AIREDALE TERRIER	AT*	288	0	288	2	286	1	287	0	288	0	288	0	272	0	288	10	278	9	279	9	279	2	286	10	278	2	286	0	288	4	284	3	285	1	287	0	288	0	288	0	286	8	280
AUSTRALIAN TERRIER	AUT*	59	0	59	0	59	0	59	1	58	0	59	0	54	0	59	0	59	0	59	3	56	5	54	2	57	0	59	3	56	0	59	0	59	0	59	0	59	0	59	0	59	0	59
AMERICAN WATER SPANIEL	AWS*	12	0	12	0	12	0	12	0	12	0	12	0	11	0	12	0	12	0	12	1	11	0	12	0	12	0	12	0	12	0	12	0	12	0	12	0	12	0	12	2	10	0	12
BEARDED COLLIE	BC*	82	0	82	0	82	0	82	0	82	0	82	1	78	0	82	1	81	0	82	2	80	0	82	0	82	0	82	0	82	0	82	1	81	0	82	0	82	0	82	0	82	0	82
BICHON FRISE	BCF*	555	2	553	4	551	21	534	4	551	1	554	16	476	3	552	1	554	3	552	29	526	41	514	11	544	0	555	18	537	6	549	3	552	1	554	0	555	1	554	0	555	7	548
BORDER COLLIE	BCO*	1216	0	1216	0	1216	4	1212	4	1212	2	1214	7	1184	2	1214	5	1211	33	1183	38	1178	6	1210	8	1208	7	1209	10	1206	23	1193	12	1204	3	1213	0	1216	2	1214	10	1200	34	1182
BEDLINGTON TERRIER	BD*	16	0	16	0	16	0	16	0	16	0	16	0	14	0	16	0	16	0	16	0	16	0	16	0	16	0	16	0	16	0	16	0	16	0	16	0	16	0	16	1	15	0	16
BEAGLE	BE*	782	1	781	1	780	2	780	4	778	4	778	7	744	2	780	1	781	1	781	87	695	22	760	13	769	14	768	40	741	13	769	13	769	0	782	1	781	0	782	15	754	16	766
BEAUCERON	BEU	12	0	12	0	12	0	12	0	12	0	12	0	12	0	12	0	12	0	12	0	12	0	12	0	12	0	12	0	12	0	12	2	10	0	12	0	12	0	12	0	12	1	11
BOUVIER DES FLANDRES	BF*	168	4	164	0	168	0	168	0	168	1	167	1	160	0	168	2	166	3	165	3	164	1	167	1	167	1	167	1	167	12	156	5	163	1	167	3	165	0	168	1	167	2	166
BRUSSELS GRIFFON	BG*	39	0	39	0	39	2	37	1	38	0	39	3	31	1	38	0	39	0	39	1	38	2	37	0	39	0	39	3	36	0	39	0	39	0	39	0	39	0	39	0	39	2	37
BASSET HOUND	BH*	449	0	449	0	449	2	447	2	447	1	448	3	435	5	444	5	444	2	447	49	400	9	440	1	448	6	443	6	443	27	422	10	439	1	448	1	448	0	449	2	445	10	439
BASENJI	BJ*	109	1	108	0	109	0	109	0	109	0	109	2	105	1	108	0	109	0	109	2	107	2	107	0	109	0	109	1	108	2	107	1	108	0	109	0	109	0	109	3	106	3	106
BLOODHOUND	BL*	58	0	58	1	57	0	58	0	58	0	58	3	53	0	58	1	57	2	56	4	54	2	56	0	58	0	58	0	58	2	56	0	58	1	57	0	58	2	56	0	58	1	57
BULL TERRIER	BLT*	190	8	182	10	180	0	190	0	190	3	187	2	185	2	188	1	189	1	189	6	184	0	190	3	187	0	190	0	190	3	187	2	188	0	190	1	189	0	190	0	189	3	187
BELGIAN MALINOIS	BM*	132	1	131	0	132	0	132	0	132	0	132	1	130	0	132	1	131	2	130	4	128	2	130	2	130	3	129	1	131	0	132	1	131	1	131	0	132	0	132	0	132	1	131
BERNESE MOUNTAIN DOG	BMD*	459	7	452	1	458	3	456	4	455	0	459	8	450	1	458	64	395	25	434	40	419	7	452	10	449	4	455	0	459	19	440	22	437	3	456	0	459	3	456	4	455	6	453
BULL MASTIFF	BMF*	263	4	259	0	263	3	260	1	262	1	262	1	259	0	263	13	250	5	258	14	249	5	258	7	256	4	259	2	261	13	250	3	260	4	259	1	262	2	261	1	262	8	255
BORDER TERRIER	BRT*	99	0	99	0	99	1	98	2	97	4	95	0	93	1	98	0	99	0	99	3	96	0	99	0	99	0	99	6	93	0	99	1	98	0	99	1	98	0	99	0	97	0	99
BRITTANY SPANIEL	BS*	407	1	406	0	407	3	404	2	405	1	406	5	380	4	403	4	403	11	396	14	393	2	405	0	407	1	406	6	401	8	399	1	406	3	404	1	406	0	407	5	402	14	393
BELGIAN SHEEPDOG	BSD*	66	0	66	0	66	0	66	0	66	0	66	0	65	0	66	0	66	0	66	4	62	0	66	1	65	0	66	1	65	6	60	0	66	0	66	0	66	0	66	2	64	1	65
BELGIAN TERVUREN	BT*	70	0	70	0	70	1	69	0	70	0	70	2	65	0	70	2	68	0	70	2	68	1	69	0	70	3	67	0	70	1	69	1	69	1	69	0	70	0	70	0	69	2	68
BLUE TICK HOUND	BTH	16	0	16	0	16	0	16	0	16	0	16	0	16	0	16	0	16	0	16	1	15	0	16	0	16	0	16	0	16	0	16	0	16	0	16	1	15	0	16	0	16	1	15
BOSTON TERRIER	BTR*	611	1	610	0	611	4	607	1	609	0	611	15	490	13	598	1	610	0	611	27	584	39	572	0	611	3	608	18	593	3	608	30	581	1	610	0	611	0	611	8	599	13	598
BULLDOG	BU*	810	12	798	3	807	1	809	2	808	8	802	9	792	2	808	11	799	16	794	25	785	39	771	19	790	6	804	0	810	22	788	8	802	1	809	2	808	4	806	7	800	6	804
BOXER	BX*	1711	77	1634	2	1709	0	1711	5	1706	2	1709	5	1681	1	1710	4	1707	10	1701	86	1625	12	1699	17	1694	31	1680	14	1697	57	1654	145	1566	4	1707	45	1666	3	1708	10	1700	33	1678
BOYKIN SPANIEL	BY	5	0	5	0	5	0	5	0	5	0	5	0	5	0	5	0	5	1	4	0	5	1	4	0	5	0	5	0	5	0	5	0	5	0	5	0	5	0	5	0	5	0	5
BORZOI	BZ*	83	0	83	0	83	1	82	1	82	2	81	0	82	0	83	0	83	0	83	6	77	0	83	0	83	1	82	0	83	0	83	0	83	2	81	2	81	1	82	1	82	0	83
CANAAN DOG	CA	7	0	7	0	7	0	7	0	7	0	7	0	7	0	7	0	7	0	7	0	7	0	7	0	7	0	7	0	7	0	7	1	6	0	7	0	7	0	7	0	7	0	7
CHESAPEAKE BAY RETRIEVER	CB*	285	3	282	1	284	0	285	0	285	0	285	5	265	2	283	6	279	10	275	9	276	1	284	5	280	1	284	0	285	7	278	2	283	1	284	0	285	3	282	1	284	4	281
CHOW CHOW	CC*	428	0	428	0	428	1	427	0	428	1	427	3	411	1	427	10	418	26	402	21	407	10	418	10	418	2	426	8	420	2	426	4	424	1	427	0	428	3	425	3	424	17	411
CHIHUAHUA	CH*	1714	5	1709	10	1704	36	1678	39	1673	8	1706	11	1650	8	1706	0	1714	1	1713	90	1624	187	1527	5	1709	1	1713	12	1702	5	1709	14	1700	1	1713	1	1713	1	1713	18	1692	36	1678
CHINESE CRESTED	CHC*	47	1	46	0	47	0	47	1	46	0	47	1	41	1	46	0	47	0	47	2	45	1	46	0	47	0	47	1	46	1	46	1	46	0	47	0	47	0	47	1	46	1	46
CLUMBER SPANIEL	CLS*	23	0	23	0	23	0	23	0	23	0	23	0	22	0	23	1	22	2	21	1	22	0	23	0	23	0	23	1	22	0	23	0	23	0	23	1	22	0	23	1	22	0	23
BLACK AND TAN COONHOUND	CN	11	0	11	0	11	0	11	0	11	0	11	0	11	0	11	0	11	1	10	0	11	0	11	0	11	0	11	1	10	0	11	0	11	0	11	0	11	0	11	0	11	0	11
COONHOUND	CNH*	48	1	47	0	48	0	48	1	47	1	47	0	46	0	48	0	48	0	48	3	45	0	48	1	47	1	47	0	48	0	48	0	48	0	48	0	48	1	47	0	48	2	46
COLLIE (Rough & Smooth only)	CO*	323	0	323	1	322	4	319	1	322	0	323	3	315	0	323	3	320	1	322	12	310	1	322	1	322	0	323	2	321	7	316	3	320	5	318	0	323	3	320	7	316	5	318
CURLY COATED RETRIEVER	CR	14	0	14	0	14	0	14	0	14	0	14	0	14	0	14	0	14	0	14	2	12	0	14	0	14	0	14	2	12	0	14	1	13	1	13	0	14	1	13	0	14	1	13
COCKER SPANIEL, AMERICAN	CS*	1931	3	1928	4	1927	4	1927	10	1921	3	1928	42	1622	38	1893	1	1930	7	1924	102	1829	42	1889	34	1897	9	1922	75	1856	45	1886	33	1898	3	1928	33	1898	0	1931	31	1894	36	1895
CAIRN TERRIER	CT*	217	0	217	0	217	2	215	4	213	0	217	1	199	1	216	2	215	0	217	1	215	13	204	0	217	3	214	7	210	4	213	2	215	0	217	1	216	0	217	1	216	5	212
DOGUE DE BORDEAUX	DB	26	3	23	0	26	0	26	0	26	0	26	0	26	0	26	0	26	0	26	1	25	1	25	1	25	0	26	0	26	1	25	0	26	0	26	0	26	1	25	0	26	0	26
DANDIE DINMONT TERRIER	DD*	10	0	10	0	10	0	10	0	10	0	10	0	9	0	10	0	10	0	10	0	10	0	10	0	10	0	10	0	10	0	10	0	10	0	10	0	10	0	10	0	10	0	10
DACHSHUND	DH*	2395	3	2392	3	2392	21	2374	15	2380	2	2393	11	2273	9	2386	2	2393	0	2395	832	1562	46	2349	2	2393	1	2394	65	2329	8	2387	18	2377	0	2395	0	2395	1	2394	13	2372	33	2362
DALMATIAN	DM*	761	4	757	1	760	0	761	3	758	1	760	0	745	1	760	1	760	3	758	79	682	5	756	5	756	9	752	13	748	11	750	2	759	4	757	3	758	0	761	10	748	16	745
DOBERMAN PINSCHER	DP*	980	1	979	1	979	2	978	2	978	0	980	4	963	0	980	0	980	2	978	125	855	5	975	10	970	9	971	1	979	23	957	13	967	23	957	72	908	8	972	4	975	18	962
ENTLEBUCHER MOUNTAIN DOG	EB	7	1	6	0	7	0	7	0	7	2	5	0	7	0	7	0	7	0	7	0	7	0	7	0	7	1	6	0	7	0	7	0	7	0	7	0	7	0	7	0	7	0	7
COCKER SPANIEL,ENGLISH	EC*	184	0	184	0	184	1	183	1	183	0	184	1	166	3	181	0	184	1	183	9	175	0	184	4	180	1	183	4	180	7	177	3	181	1	183	0	184	0	184	2	181	2	182
SPRINGER SPANIEL, ENGLISH	EN*	775	0	775	0	775	9	766	1	774	6	769	3	729	7	768	6	769	16	759	24	751	10	765	15	760	5	770	18	757	20	755	9	766	7	768	6	769	3	772	8	764	17	758
ENGLISH POINTER	EPT*	132	0	132	0	132	0	132	0	132	0	132	0	131	0	132	0	132	1	131	2	130	3	129	1	131	2	130	0	132	2	130	9	123	2	130	1	131	0	132	0	132	1	131
ENGLISH SETTER	ES*	116	0	116	0	116	0	116	0	116	0	116	0	112	0	116	3	113	4	112	4	112	1	115	1	115	0	116	1	115	1	115	2	114	0	116	0	116	2	114	1	115	1	115
BRIARD	FB	60	0	60	0	60	0	60	0	60	0	60	0	60	0	60	0	60	2	58	0	60	1	59	0	60	0	60	3	57	3	57	4	56	0	60	0	60	0	60	0	60	0	60
BULLDOG, FRENCH	FBU*	170	1	169	0	170	0	170	2	168	2	168	4	165	0	170	0	170	1	169	46	124	11	159	0	170	0	170	1	169	0	170	4	166	0	170	0	170	0	170	3	167	1	169
ENGLISH FOXHOUND	FH*	3	0	3	0	3	0	3	0	3	0	3	0	2	0	3	0	3	0	3	0	3	0	3	0	3	0	3	0	3	0	3	0	3	0	3	0	3	0	3	0	3	0	3
FINNISH SPITZ	FNS*	21	0	21	0	21	0	21	0	21	0	21	0	20	0	21	0	21	0	21	1	20	1	20	0	21	0	21	0	21	1	20	0	21	0	21	0	21	0	21	1	20	1	20
FLAT COATED RETRIEVER	FR*	128	0	128	0	128	0	128	2	126	1	127	1	126	1	127	1	127	4	124	1	127	3	125	4	124	0	128	1	127	4	124	3	125	0	128	2	126	0	128	0	128	2	126
FOX TERRIER	FT*	200	0	200	1	199	1	199	2	198	2	198	5	183	3	197	0	200	0	200	5	195	7	193	0	200	1	199	2	198	4	196	7	193	0	200	0	200	0	200	0	199	9	191
GREAT DANE	GD*	642	4	638	0	642	0	642	0	642	0	642	2	635	0	642	4	638	9	633	75	567	11	631	3	639	5	637	2	640	8	634	3	639	23	619	47	595	18	624	1	641	6	636
GREAT PYRENEES	GP*	175	0	175	1	174	0	175	0	175	0	175	1	173	0	175	4	171	8	167	6	169	15	160	9	166	0	175	0	175	0	175	0	175	17	158	0	175	0	175	0	175	3	172
GREYHOUND	GH*	235	0	235	1	234	0	235	0	235	0	235	0	229	1	234	0	235	0	235	16	219	0	235	0	235	1	234	1	234	8	227	3	232	14	221	0	235	1	234	4	229	2	233
GOLDEN RETRIEVER	GR*	4659	64	4595	8	4651	4	4655	16	4643	3	4656	41	4443	3	4656	127	4532	199	4460	155	4504	44	4615	55	4604	101	4558	36	4623	197	4462	146	4513	74	4585	14	4645	11	4648	52	4591	83	4576
GERMAN SHEPHERD DOG	GS*	3609	27	3582	3	3606	27	3582	2	3607	4	3605	27	3530	3	3606	121	3488	217	3392	379	3227	29	3580	32	3577	50	3559	8	3601	48	3561	6	3603	29	3580	7	3602	30	3579	36	3562	95	3514
SCHNAUZER, GIANT	GSC*	130	0	130	0	130	0	130	0	130	0	130	0	128	0	130	1	129	3	127	2	128	1	129	2	128	1	129	2	128	2	128	2	128	2	128	2	128	0	130	3	127	1	129
GORDON SETTER	GSE*	81	0	81	0	81	0	81	0	81	0	81	0	78	0	81	1	80	1	80	2	79	0	81	1	80	0	81	1	80	6	75	0	81	0	81	1	80	0	81	0	81	3	78
GERMAN SHORTHAIRED POINTER	GSP*	651	2	649	1	650	1	650	0	651	0	651	1	634	1	650	2	649	7	644	29	622	3	648	7	644	10	641	5	646	9	642	16	635	5	646	1	650	7	644	9	636	29	622
GERMAN WIREHAIRED POINTER	GWP*	97	0	97	0	97	0	97	0	97	0	97	0	95	0	97	0	97	4	93	4	93	1	96	4	93	3	94	1	96	1	96	0	97	1	96	0	97	0	97	1	95	1	96
HARRIER	HA	4	0	4	0	4	0	4	0	4	0	4	0	4	0	4	0	4	0	4	0	4	0	4	0	4	0	4	0	4	0	4	0	4	0	4	0	4	0	4	0	4	0	4
HAVANESE	HAV*	89	0	89	1	88	0	89	3	86	1	88	3	84	0	89	0	89	0	89	2	87	5	84	0	89	0	89	0	89	0	89	1	88	0	89	0	89	0	89	0	89	0	89
IBIZAN HOUND	IH	9	0	9	0	9	0	9	0	9	0	9	0	9	0	9	0	9	0	9	0	9	0	9	0	9	0	9	0	9	0	9	0	9	0	9	0	9	0	9	0	9	0	9
IRISH SETTER	IR*	117	0	117	0	117	1	116	0	117	0	117	2	113	0	117	0	117	2	115	6	111	0	117	0	117	1	116	1	116	4	113	0	117	1	116	0	117	4	113	3	114	2	115
IRISH TERRIER	IRT*	31	1	30	0	31	0	31	0	31	1	30	0	30	0	31	0	31	0	31	0	31	0	31	0	31	1	30	0	31	0	31	0	31	0	31	0	31	0	31	1	30	0	31
ITALIAN GREYHOUND	IT*	100	0	100	0	100	0	100	1	99	0	100	1	95	0	100	0	100	0	100	3	97	3	97	0	100	4	96	0	100	1	99	2	98	1	99	0	100	0	100	2	97	0	100
IRISH WOLFHOUND	IW	148	1	147	0	148	0	148	1	147	0	148	0	148	0	148	1	147	0	148	16	132	1	147	0	148	0	148	2	146	0	148	1	147	10	138	9	139	4	144	0	148	0	148
IRISH WATER SPANIEL	IWS	10	0	10	0	10	0	10	0	10	0	10	1	9	0	10	0	10	0	10	0	10	0	10	0	10	0	10	0	10	0	10	0	10	1	9	0	10	0	10	1	9	0	10
JACK RUSSELL TERRIER	JRT*	1013	1	1012	2	1011	8	1005	9	1004	3	1010	22	935	44	969	1	1012	1	1012	33	980	25	988	5	1008	4	1009	5	1008	5	1008	16	997	2	1011	1	1012	0	1013	10	1001	35	978
JAPANESE CHIN	JS*	43	0	43	1	42	1	42	0	43	0	43	0	41	2	41	0	43	0	43	4	39	8	35	0	43	0	43	0	43	0	43	0	43	0	43	0	43	0	43	0	43	0	43
CAVALIER KING CHARLES SPANIEL	KCS*	348	0	348	3	345	5	343	2	346	0	348	8	336	1	347	0	348	2	346	21	327	26	322	0	348	0	348	0	348	0	348	0	348	0	348	0	348	0	348	6	340	4	344
KEESHOND	KE*	166	0	166	0	166	1	165	1	165	1	165	0	160	0	166	1	165	3	163	5	161	3	163	1	165	2	164	9	157	2	164	1	165	1	165	0	166	0	166	4	161	2	164
KOMONDOR	KO*	9	1	8	0	9	0	9	1	8	0	9	0	8	0	9	0	9	0	9	0	9	0	9	0	9	0	9	0	9	0	9	0	9	0	9	0	9	0	9	0	9	0	9
KERRY BLUE TERRIER	KT*	48	0	48	0	48	0	48	0	48	0	48	0	45	0	48	0	48	1	47	4	44	0	48	0	48	0	48	0	48	3	45	1	47	0	48	0	48	0	48	0	48	0	48
KUVASZ	KU	16	0	16	0	16	0	16	0	16	0	16	0	16	0	16	1	15	1	15	3	13	0	16	0	16	0	16	0	16	0	16	1	15	0	16	0	16	0	16	0	16	0	16
LHASA APSO	LA*	618	0	618	2	616	0	618	2	616	1	617	7	540	6	612	2	616	2	616	51	567	29	589	7	611	0	618	24	594	4	614	3	615	2	616	0	618	0	618	4	614	8	610
LAKELAND TERRIER	LAK*	20	0	20	0	20	0	20	0	20	0	20	0	19	0	20	0	20	0	20	0	20	0	20	1	19	0	20	1	19	0	20	0	20	0	20	0	20	0	20	0	20	0	20
LEONBERGER	LB	27	0	27	0	27	0	27	0	27	0	27	1	26	0	27	0	27	2	25	0	27	0	27	1	26	0	27	0	27	0	27	0	27	2	25	0	27	0	27	0	27	1	26
LABRADOR RETRIEVER	LR*	8644	17	8627	12	8632	18	8626	37	8607	5	8639	84	8399	6	8638	336	8308	274	8370	351	8292	118	8526	190	8454	71	8573	71	8573	132	8512	258	8386	67	8577	27	8617	23	8621	83	8531	256	8388
MASTIFF	MF*	441	7	434	3	438	0	441	1	440	1	440	3	433	0	441	29	412	23	418	35	406	13	428	21	420	5	436	0	441	4	437	1	440	11	430	5	436	2	439	1	440	6	435
MALTESE	ML*	712	3	709	5	707	19	693	37	675	4	708	8	656	4	708	3	709	0	712	31	681	91	621	5	707	2	710	15	697	9	703	8	704	0	712	0	712	1	711	3	708	9	703
MINIATURE PINSCHER	MP*	424	0	424	2	422	1	423	3	421	0	424	4	394	4	420	0	424	0	424	36	388	25	399	1	423	0	424	5	419	0	424	4	420	0	424	0	424	0	424	2	421	6	418
SCHNAUZER, MINIATURE	MSC*	1008	3	1005	2	1006	5	1003	37	971	1	1007	15	910	2	1006	0	1008	0	1008	57	950	14	994	1	1007	5	1003	49	959	13	995	18	990	2	1006	0	1008	2	1006	8	1000	15	993
MANCHESTER TERRIER	MT*	49	0	49	0	49	0	49	0	49	0	49	0	45	1	48	0	49	0	49	1	47	2	47	0	49	0	49	0	49	0	49	1	48	0	49	0	49	0	49	1	48	1	48
NORWEGIAN ELKHOUND	NE*	82	0	82	0	82	0	82	0	82	1	81	1	79	0	82	1	81	4	78	2	80	0	82	0	82	2	80	1	81	3	79	3	79	0	82	0	82	1	81	0	80	2	80
NEWFOUNDLAND	NF*	603	41	562	1	602	10	593	1	602	1	602	4	594	0	603	62	541	39	564	19	584	19	584	17	586	1	602	2	601	6	597	2	601	7	596	9	594	1	602	3	600	1	602
NORFOLK TERRIER	NFT*	26	0	26	0	26	0	26	0	26	0	26	0	23	0	26	0	26	0	26	1	25	6	20	0	26	0	26	0	26	1	25	0	26	0	26	0	26	0	26	0	26	0	26
NEAPOLITAN MASTIFF	NMF	46	0	46	2	44	0	46	0	46	0	46	1	45	0	46	2	44	5	41	0	46	1	45	0	46	0	46	0	46	1	45	1	45	2	44	3	43	0	46	0	46	0	46
NORWICH TERRIER	NT*	54	0	54	0	54	0	54	4	50	0	54	0	53	0	54	0	54	0	54	1	53	1	53	0	54	0	54	1	53	0	54	1	53	0	54	0	54	1	53	0	53	0	54
OTTER HOUND	OH	5	0	5	0	5	0	5	0	5	0	5	0	5	0	5	1	4	2	3	0	5	0	5	1	4	0	5	0	5	0	5	0	5	0	5	0	5	0	5	0	5	0	5
PAPILLON	PA*	147	0	147	0	147	2	145	2	145	0	147	1	142	0	147	0	147	0	147	10	137	11	136	0	147	0	147	0	147	3	144	1	146	0	147	0	147	0	147	2	142	2	145
PETIT BASSET GRIFFON VENDEEN	PBG*	52	0	52	0	52	1	51	1	51	1	51	4	47	0	52	0	52	0	52	0	52	0	52	1	51	0	52	0	52	0	52	0	52	0	52	0	52	0	52	0	51	0	52
PUG	PG*	968	7	961	5	963	0	968	54	914	2	966	9	917	1	967	0	968	2	966	95	873	56	912	1	967	0	968	1	967	8	960	57	911	0	968	1	967	0	968	4	961	9	959
PHARAOH HOUND	PH	7	0	7	0	7	0	7	0	7	0	7	0	7	0	7	0	7	0	7	0	7	0	7	0	7	0	7	0	7	0	7	0	7	0	7	0	7	0	7	0	7	0	7
PEKINGESE	PK*	306	0	306	0	306	1	305	4	302	1	305	4	282	0	306	0	306	1	305	63	243	20	286	0	306	1	305	4	302	4	302	2	304	0	306	0	306	0	306	4	299	2	304
PLOTT HOUND	PL	16	0	16	0	16	0	16	0	16	0	16	0	16	0	16	0	16	0	16	0	16	0	16	0	16	0	16	0	16	0	16	0	16	0	16	0	16	0	16	0	16	0	16
POMERANIAN	PN*	834	4	830	2	832	26	808	6	827	4	830	5	792	1	833	2	832	1	833	36	798	146	688	7	827	0	834	7	827	2	832	2	832	0	834	0	834	0	834	11	819	9	825
POODLE, STANDARD	PO*	1128	0	1128	4	1124	1	1127	5	1123	0	1128	15	1007	15	1113	2	1126	13	1115	62	1066	42	1086	8	1120	1	1127	16	1112	14	1114	7	1121	6	1122	2	1126	14	1114	17	1102	24	1104
POLISH SHEEPDOG	PSD	4	0	4	0	4	0	4	0	4	0	4	0	4	0	4	0	4	0	4	0	4	0	4	0	4	0	4	0	4	0	4	0	4	0	4	0	4	0	4	0	4	0	4
PULI	PU*	24	0	24	0	24	0	24	0	24	0	24	0	22	0	24	0	24	1	23	0	24	0	24	0	24	0	24	1	23	0	24	0	24	0	24	0	24	0	24	0	24	0	24
PORTUGUESE WATER SPANIEL	PW*	120	0	120	0	120	0	120	1	119	1	119	1	113	0	120	1	119	8	112	0	120	0	120	0	120	2	118	0	120	3	117	2	118	1	119	1	119	0	120	2	117	2	118
RED BONE HOUND	RCN*	23	0	23	0	23	0	23	0	23	1	22	0	22	0	23	0	23	0	23	0	23	1	22	0	23	1	22	0	23	1	22	1	22	1	22	0	23	0	23	1	22	0	23
ROTTWEILER	RO*	2963	29	2934	2	2961	1	2962	5	2958	1	2962	23	2890	1	2962	187	2776	160	2802	170	2792	25	2938	137	2826	16	2947	12	2951	112	2851	24	2939	152	2811	9	2954	11	2952	6	2953	48	2915
RHODESIAN RIDGEBACK	RR*	428	1	427	0	428	0	428	0	428	0	428	2	423	1	427	8	420	5	423	22	406	1	427	2	426	1	427	7	421	15	413	24	404	4	424	2	426	3	425	4	424	15	413
SAMOYED	SA*	226	1	225	0	226	0	226	1	225	0	226	4	204	2	224	1	225	8	218	9	217	1	225	3	223	1	225	1	225	3	223	0	226	3	223	0	226	1	225	2	223	4	222
SAINT BERNARD	SB*	212	3	209	2	210	0	212	0	212	1	211	2	209	0	212	9	203	16	196	10	202	1	211	3	209	1	211	0	212	5	207	0	212	16	196	8	204	8	204	2	209	3	209
STAFFORDSHIRE TERRIER	SBT*	445	2	443	3	442	0	445	0	445	2	443	1	440	0	445	7	438	2	443	19	426	10	435	16	429	10	435	8	437	7	438	19	426	1	444	0	445	2	443	0	443	23	422
SCHNAUZER, STANDARD	SC*	267	0	267	1	266	1	266	4	263	0	267	4	238	1	266	0	267	1	266	13	254	10	257	1	266	1	266	9	258	3	264	8	259	1	266	0	267	1	266	3	264	2	265
OLD ENGLISH SHEEPDOG	SD*	143	2	141	0	143	0	143	1	142	0	143	0	138	0	143	0	143	4	139	10	133	2	141	1	142	0	143	0	143	5	138	0	143	3	140	2	141	1	142	0	142	2	141
SCOTTISH DEERHOUND	SDH	26	0	26	0	26	0	26	1	25	0	26	0	26	0	26	0	26	0	26	1	25	0	26	0	26	0	26	0	26	0	26	0	26	1	25	4	22	0	26	0	26	0	26
SEALYHAM TERRIER	SEL*	14	0	14	0	14	0	14	0	14	0	14	3	10	3	11	0	14	0	14	0	14	0	14	1	13	0	14	0	14	1	13	0	14	0	14	0	14	0	14	0	14	0	14
SIBERIAN HUSKY	SH*	570	1	569	0	570	0	570	2	568	0	570	20	525	4	566	1	569	1	569	37	533	3	567	7	563	5	565	10	560	10	560	9	561	5	565	1	569	2	568	12	555	17	553
SHIH TZU	SHT*	1097	2	1095	5	1092	5	1092	32	1064	2	1095	12	984	9	1088	1	1096	2	1095	57	1039	45	1052	1	1096	0	1097	44	1053	12	1085	4	1093	0	1097	1	1096	0	1097	8	1087	17	1080
SHIBA INU	SHU*	118	0	118	0	118	0	118	1	117	6	112	1	113	0	118	0	118	0	118	5	113	8	110	2	116	0	118	0	118	0	118	0	118	0	118	0	118	0	118	1	116	3	115
SCHIPPERKE	SK*	146	0	146	0	146	1	145	0	146	0	146	0	134	1	145	0	146	0	146	7	139	6	140	0	146	0	146	1	145	5	141	0	146	0	146	0	146	0	146	3	141	0	146
SILKY TERRIER	SKT*	122	0	122	0	122	2	120	2	120	0	122	1	94	2	120	0	122	0	122	5	117	8	114	3	119	1	121	5	117	1	121	2	120	0	122	0	122	0	122	1	121	3	119
SALUKI	SL	85	0	85	2	83	0	85	0	85	0	85	0	85	0	85	0	85	0	85	1	84	1	84	1	84	2	83	1	84	1	84	0	85	0	85	5	80	0	85	0	85	0	85
SWISS MOUNTAIN DOG	SMH*	43	0	43	0	43	0	43	1	42	0	43	1	42	0	43	2	41	0	43	2	41	0	43	1	42	1	42	0	43	0	43	0	43	1	42	0	43	0	43	0	42	1	42
SHAR PEI	SP*	442	1	441	0	442	0	442	1	441	3	439	4	430	7	435	4	438	5	437	15	427	12	430	7	435	0	442	4	438	7	435	39	403	0	442	0	442	4	438	2	440	13	429
SHETLAND SHEEPDOG	SS*	875	5	870	3	872	8	867	5	870	2	873	4	841	0	875	11	864	8	867	31	844	11	864	1	874	2	873	24	851	19	856	12	863	1	874	0	875	0	875	21	850	10	865
SCOTTISH TERRIER	ST*	269	0	269	0	269	0	269	0	269	0	269	2	258	1	268	0	269	0	269	3	266	6	263	1	268	1	268	18	251	21	248	1	268	0	269	1	268	0	269	4	265	4	265
SUSSEX SPANIEL	SU	2	0	2	0	2	0	2	0	2	0	2	0	2	0	2	0	2	0	2	0	2	0	2	0	2	0	2	0	2	0	2	0	2	0	2	0	2	0	2	0	2	0	2
SKYE TERRIER	SYT*	12	0	12	0	12	0	12	0	12	0	12	0	11	0	12	1	11	0	12	1	11	0	12	0	12	1	11	0	12	0	12	0	12	0	12	1	11	0	12	0	12	1	11
FOX TERRIER, TOY	TFT*	91	0	91	0	91	1	90	0	91	0	91	4	80	7	84	0	91	0	91	6	85	8	83	0	91	1	90	4	87	0	91	0	91	0	91	0	91	0	91	0	91	3	88
POODLE, MINIATURE; POODLE, TOY	TPO*	1240	1	1239	6	1232	20	1220	17	1221	3	1237	18	1003	28	1212	1	1239	0	1240	55	1184	151	1089	5	1235	0	1240	30	1210	7	1233	9	1231	1	1239	2	1238	0	1240	16	1218	10	1230
TIBETAN SPANIEL	TS*	19	0	19	0	19	0	19	1	18	0	19	0	17	0	19	0	19	0	19	5	14	2	17	0	19	0	19	0	19	0	19	0	19	0	19	0	19	0	19	0	18	0	19
TIBETAN TERRIER	TT*	221	3	218	1	220	0	221	0	221	5	216	6	179	2	219	1	220	3	218	5	216	5	216	0	221	0	221	6	215	11	210	1	220	1	220	1	220	0	221	1	220	2	219
VIZSLA	VZ*	251	0	251	0	251	4	247	3	248	0	251	1	248	0	251	2	249	7	244	13	238	0	251	0	251	5	246	4	247	6	245	12	239	1	250	1	250	0	251	5	245	6	245
WELSH CORGI, CARDIGAN	WCC*	64	0	64	0	64	1	63	0	64	0	64	0	62	0	64	0	64	1	63	8	56	0	64	0	64	0	64	0	64	3	61	1	63	0	64	0	64	0	64	0	63	0	64
WELSH CORGI, PEMBROKE	WCP*	521	0	521	1	520	8	513	4	517	0	521	4	500	0	521	1	520	6	515	79	442	6	515	5	516	0	521	9	512	17	504	2	519	2	519	0	521	0	521	4	515	6	515
WEIMARANER	WE*	321	1	320	0	321	4	317	0	321	0	321	8	308	2	319	2	319	4	317	28	293	1	320	4	317	2	319	4	317	10	311	22	299	3	318	3	318	1	320	3	318	12	309
FOX TERRIER, WIREHAIRED	WF*	98	0	98	1	97	0	98	0	98	4	94	1	85	1	97	0	98	0	98	7	91	4	94	0	98	0	98	4	94	1	97	0	98	0	98	0	98	0	98	3	95	2	96
WIREHAIRED POINTING GRIFFON	WG	23	0	23	0	23	0	23	0	23	1	22	0	23	0	23	0	23	1	22	0	23	1	22	0	23	0	23	1	22	1	22	0	23	0	23	0	23	0	23	0	23	0	23
WEST HIGHLAND WHITE TERRIER	WH*	536	0	536	0	536	4	532	6	530	1	535	1	505	1	535	0	536	1	535	8	528	25	511	9	527	1	535	12	524	10	526	3	533	1	535	0	536	0	536	0	536	7	529
SOFT COATED WHEATEN TERRIER	WHT*	149	0	149	1	148	3	146	3	146	0	149	1	145	0	149	1	148	0	149	4	145	3	146	2	147	1	148	0	149	1	148	0	149	0	149	0	149	0	149	0	149	3	146
WHIPPET	WP*	168	3	165	3	165	0	168	1	167	0	168	1	163	1	167	0	168	0	168	13	155	0	168	1	167	14	154	3	165	3	165	4	164	1	167	0	168	0	168	1	167	0	168
SPRINGER SPANIEL, WELSH	WS*	28	0	28	0	28	0	28	1	27	0	28	0	28	0	28	1	27	0	28	1	27	0	28	1	27	0	28	1	27	0	28	0	28	0	28	1	27	0	28	0	27	0	28
WELSH TERRIER	WT*	65	0	65	1	64	1	64	0	65	0	65	1	61	1	64	0	65	0	65	1	64	0	65	1	64	1	64	2	63	0	65	0	65	0	65	0	65	0	65	1	63	0	65
YORKSHIRE TERRIER	YT*	1396	2	1394	12	1384	19	1377	135	1259	0	1396	10	1297	8	1388	0	1396	1	1395	52	1344	192	1204	11	1385	0	1396	22	1374	11	1385	7	1389	0	1396	0	1396	0	1396	13	1381	10	1386
AKCMISC	AKCMISC*	215	0	215	1	214	1	214	1	214	0	215	0	206	0	215	0	215	1	214	4	211	8	207	1	214	1	214	3	212	0	215	0	215	1	214	0	215	0	215	0	215	9	206
FSS	FSS*	138	0	138	0	138	10	128	2	136	1	137	1	137	0	138	3	135	6	132	2	136	6	132	3	135	1	137	0	138	1	137	2	136	1	137	0	138	1	137	1	135	9	129
MIX	MIX*	22627	34	22593	38	22589	86	22541	75	22552	18	22609	135	21711	91	22536	204	22423	469	22158	993	21629	508	22119	423	22204	162	22465	321	22305	419	22208	390	22237	206	22421	35	22592	42	22585	158	22421	772	21855
PITBULL	PIT*	1360	12	1348	3	1357	2	1358	0	1360	2	1358	5	1347	1	1359	11	1349	9	1351	48	1312	32	1328	28	1332	14	1346	9	1351	30	1330	43	1317	9	1351	3	1357	0	1360	2	1356	68	1292
1 key to conditions: aortic stenosis (ASTEN), mitral valve disease (MVD), patent ductus arteriosus (PDA), portosystemic shunt (PSS), ventricular septal defect (VSD), cataracts (CAT), lens luxation (LLUX), elbow dysplasia (ELDYS), hip dysplasia (HPDYS), intervertebral disk disease (IVDD), patella luxation (PLUX), ruptured anterior cruciate ligament (RACL), hemangiosarcoma (HMSC), hyperadrenocortic…
* For certain conditions in this breed, individuals that were suspected but unconfirmed were omitted from the counts.
